# Supplementary material for: Engaging Patients with Late-Stage Non-Small Cell Lung Cancer in Shared Decision Making about Treatment
Source: MDPI journal article supplement (doi:10.3390/jpm11100998), 2021-10-01
Supplement: s1 [file s1]

## Care Plan Option Preference Report

PATIENT:

NURSE:

DOB:

CONTACT INFO:

ADDRESS:

APPOINTMENT DATE: \_\_\_\_/\_\_\_\_/\_\_\_\_

APPOINTMENT TIME:

| CARE PLAN OPTIONS |                          |                          |
|-------------------|--------------------------|--------------------------|
| PREFERENCE        | Option ____              | Option ____              |
| Do Not Prefer     | <input type="checkbox"/> | <input type="checkbox"/> |
| Unsure            | <input type="checkbox"/> | <input type="checkbox"/> |
| Prefer            | <input type="checkbox"/> | <input type="checkbox"/> |

Care Plan Option 1: Chemotherapy and Immunotherapy

Care Plan Option 2: Immunotherapy

Care Plan Option 3: Chemotherapy

Care Plan Option 4: Targeted Therapy

Care Plan Option 5: Supportive Care

Care Plan Option 6: Clinical Trial

Nurse Comments:
